# Supplementary material for: BRCA1/2 Reversion Mutations in Patients Treated with Poly ADP-Ribose Polymerase (PARP) Inhibitors or Platinum Agents
Source: MDPI journal article supplement (doi:10.3390/medicina58121818), 2022-12-10
Supplement: s1 [file s1]

**Table S1.** *BRCA1* and *BRCA2* reversion mutation details.

|    |                    | <i>BRCA1</i> mutation 1        |                         |      |  | <i>BRCA1</i> mutation 2   |                      |      |     | <i>BRCA1</i> mutation 3 |            |      |     |
|----|--------------------|--------------------------------|-------------------------|------|--|---------------------------|----------------------|------|-----|-------------------------|------------|------|-----|
|    | Cancer Type        | p. changes                     | c. changes              | Exon |  | p. changes                | c. changes           | Exon | VAF | p. changes              | c. changes | Exon | VAF |
| 1  | Breast             | E1694Y                         | c.5080_5082delinsTAC    | 17   |  | E1694L                    | c.5080_5081delinsTT  | 17   | 8   | E1694*                  | c.5080G>T  | 17   | 58  |
| 2  | Breast             | K893fs                         | c.2679_2682delGAAA      | 10   |  | Q867_K893delinsMCNLCPLWVL | c.2598_2679delins34  | 10   | 22  |                         |            |      |     |
| 3  | Breast             | Q563Y                          | c.1687_1689delinsTAC    | 10   |  | Q563*                     | c.1687C>T            | 10   | 69  |                         |            |      |     |
| 4  | Breast             | R1076fs                        | c.3227delG              | 10   |  | L1072_R1076delinsQ        | c.3215_3227delinsA   | 10   | 25  |                         |            |      |     |
| 5  | Breast             | V627fs                         | c.1874_1877dupTAGT      | 10   |  | L625Y                     | c.1873_1875delinsTAT | 10   | 38  |                         |            |      |     |
| 6  | Breast             | G1825fs                        | c.5474_5481del8         | 23   |  | I1824_Q1826del            | c.5472_5480del9      | 23   | 21  |                         |            |      |     |
| 7  | Cervical           | L718_E720del                   | c.2152_2160del9         | 10   |  | E720fs                    | c.2157dupA           | 10   | 29  |                         |            |      |     |
| 8  | Cholangiocarcinoma | S1374fs                        | c.4120_4121delAG        | 11   |  | A1368_E1373delinsQHLGV    | c.4101_4118delins15  | 11   | 16  |                         |            |      |     |
| 9  | Ovarian            | G1366S                         | c.4096G>A               | 10   |  | E1250Y                    | c.3748_3750delinsTAT | 10   | 19  | E1250*                  | c.3748G>T  | 10   | 54  |
| 10 | Ovarian            | L30Y                           | c.89_90delinsAC         | 3    |  | L30*                      | c.89T>A              | 3    | 50  |                         |            |      |     |
| 11 | Ovarian            | c.213-13_213-12delinsTG        | c.213-13_213-12delinsTG | 5    |  | c.213-12A>G               | c.213-12A>G          | 5    | 69  |                         |            |      |     |
| 12 | Ovarian            | W385L                          | c.1154_1155delinsTA     | 10   |  | W385*                     | c.1155G>A            | 10   | 56  |                         |            |      |     |
| 13 | Ovarian            | C1225_R1243del                 | c.3673_3729del57        | 10   |  | V1234fs                   | c.3700_3704delGTAAA  | 10   | 47  |                         |            |      |     |
| 14 | Ovarian            | Q1111fs                        | c.3331_3334delCAAG      | 10   |  | Q1111del                  | c.3330_3332delGCA    | 10   | 42  |                         |            |      |     |
| 15 | Ovarian            | Q1408L                         | c.4222_4223delinsTT     | 12   |  | Q1408*                    | c.4222C>T            | 12   | 64  |                         |            |      |     |
| 16 | Ovarian            | R1085_Q1096del                 | c.3255_3290del36        | 10   |  | E1092fs                   | c.3273delT           | 10   | 45  |                         |            |      |     |
| 17 | Ovarian            | L22_I26del                     | c.65_79del15            | 2    |  | E23fs                     | c.68_69delAG         | 2    | 61  |                         |            |      |     |
| 18 | Ovarian            | D825_I845delinsEQKALSIHWDMKLTT | c.2475_2534delins42     | 10   |  | D825fs                    | c.2475delC           | 10   | 49  |                         |            |      |     |
| 19 | Ovarian            | Q1756_R1758delinsPGQ           | c.5267_5273delins7      | 19   |  | Q1756fs                   | c.5266dupC           | 19   | 68  |                         |            |      |     |
| 20 | Ovarian            | N1354_E1357del                 | c.4060_4071del12        | 10   |  | N1355fs                   | c.4065_4068delTCAA   | 10   | 52  |                         |            |      |     |
| 21 | Ovarian            | Q356*                          | c.1066C>T               | 10   |  | Q356E                     | c.1066C>G            | 10   | 30  |                         |            |      |     |
| 22 | Ovarian            | E1250_N1259del                 | c.3748_3777del30        | 10   |  | E1250*                    | c.3748G>T            | 10   | 19  |                         |            |      |     |
| 23 | Ovarian            | D396_S425del                   | c.1186_1275del90        | 10   |  | Y422*                     | c.1266T>G            | 10   | 49  |                         |            |      |     |
| 24 | Ovarian            | E1609fs                        | c.4826_4837delinsG      | 15   |  | L1605_S1613delinsG        | c.4812_4837delinsGG  | 15   | 25  |                         |            |      |     |
| 25 | Ovarian            | E337K                          | c.1009G>A               | 10   |  | E337fs                    | c.1008delA           | 10   | 45  |                         |            |      |     |
| 26 | Ovarian            | K894fs                         | c.2681_2682delAA        | 10   |  | G890_K894delinsR          | c.2667_2681delinsAAG | 10   | 21  |                         |            |      |     |
| 27 | Ovarian            | G1371_S1383del                 | c.4110_4148del39        | 11   |  | G1371fs                   | c.4110_4111delTG     | 11   | 46  | L1365V                  | c.4093T>G  | 10   | 47  |

|                  |             |                               |                      |                  |     |                                 |                       |                  |     |                     |                      |      |     |
|------------------|-------------|-------------------------------|----------------------|------------------|-----|---------------------------------|-----------------------|------------------|-----|---------------------|----------------------|------|-----|
| 28               | Ovarian     | K339_L347delinsR              | c.1016_1040delinsG   | 10               |     | K339fs                          | c.1016delA            | 10               | 25  |                     |                      |      |     |
| 29               | Ovarian     | T276fs                        | c.815_824dup10       | 10               |     | A254_V271del                    | c.761_814del54        | 10               | 14  |                     |                      |      |     |
| 30               | Ovarian     | D430_I441delinsRLTGQ          | c.1288_1323delins15  | 10               |     | D430fs                          | c.1287dupA            | 10               | 51  |                     |                      |      |     |
| 31               | Pancreatic  | Q1756_R1758delinsPG           | c.5267_5272delinsCAG | 19               |     | Q1756fs                         | c.5266dupC            | 19               | 50  |                     |                      |      |     |
| 32               | Pancreatic  | E1250_S1262del                | c.3747_3785del39     | 10               |     | E1250*                          | c.3748G>T             | 10               | 66  |                     |                      |      |     |
| BRCA2 mutation 1 |             |                               |                      | BRCA2 mutation 2 |     |                                 |                       | BRCA2 mutation 3 |     |                     |                      |      |     |
|                  | Cancer Type | p. changes                    | c. changes           | Exon             | VAF | p. changes                      | c. changes            | Exon             | VAF | p. changes          | c. changes           | Exon | VAF |
| 33               | Bladder     | I1859fs                       | c.5576_5579delTTAA   | 11               | 69  | I1859del                        | c.5576_5578delTTA     | 11               | 18  | S646_P655delinsT    | c.1937_1963del27     | 11   | 18  |
| 34               | Breast      | Q2157_K2162delinsISTR         | c.6468_6485delins12  | 11               | 40  | K2162fs                         | c.6486_6489delACAA    | 11               | 36  |                     |                      |      |     |
| 35               | Breast      | F2011_V2014del                | c.6030_6041del12     | 11               | 19  | K2013*                          | c.6037A>T             | 11               | 76  |                     |                      |      |     |
| 36               | Breast      | D935_Y949del                  | c.2804_2848del45     | 11               | 68  | A938fs                          | c.2808_2811delACAA    | 11               | 14  |                     |                      |      |     |
| 37               | Breast      | K1881fs                       | c.5641_5644delAAAT   | 11               | 14  | S1882_K1883del                  | c.5644_5649delTCAAA A | 11               | 13  | Y3098*              | c.9294C>G            | 25   | 49  |
| 38               | Breast      | N243fs                        | c.729delT            | 9                | 7   | c.7618-1_7625delins8            | c.7618-1_7625delins8  | 16               | 7   | c.7618-1G>A         | c.7618-1G>A          | 16   | 40  |
| 39               | Breast      | L105S                         | c.314T>C             | 3                | 11  | L105*                           | c.314T>G              | 3                | 38  |                     |                      |      |     |
| 40               | Breast      | K1057fs                       | c.3170_3174delAGAAA  | 11               | 55  | K1057_Q1063delinsTEQA           | c.3170_3189delins11   | 11               | 29  |                     |                      |      |     |
| 41               | Breast      | R2520S                        | c.7558_7559delinsTC  | 15               | 63  | R2520*                          | c.7558C>T             | 15               | 18  |                     |                      |      |     |
| 42               | Breast      | E425_K426del                  | c.1275_1280delAAAAGA | 10               | 27  | D427fs                          | c.1278delA            | 10               | 49  |                     |                      |      |     |
| 43               | Breast      | N422fs                        | c.1265delA           | 10               | 37  | N422_K436delinsIFQK KTYYTEN KRQ | c.1265_1306delins39   | 10               | 33  |                     |                      |      |     |
| 44               | Breast      | L2015_N2030delinsTNIQTSSQEKKI | c.6043_6090delins36  | 11               | 30  | D2023_N2030delinsQEKKI          | c.6067_6090delins15   | 11               | 9   | T2031fs             | c.6091dupA           | 11   | 34  |
| 45               | Breast      | M1300_E1311del                | c.3899_3934del36     | 11               | 28  | G1303_T1310del                  | c.3908_3931del24      | 11               | 18  | E1308*              | c.3922G>T            | 11   | 24  |
| 46               | Breast      | V1775_Q1782delinsLRMLKI       | c.5323_5346delins18  | 11               | 19  | N1784fs                         | c.5350_5351delAA      | 11               | 37  |                     |                      |      |     |
| 47               | Breast      | K1881fs                       | c.5641_5644delAAAT   | 11               | 22  | K1881_E1895delinsQKFAKRKLW Q    | c.5641_5683delins28   | 11               | 45  |                     |                      |      |     |
| 48               | Breast      | F2130I                        | c.6388T>A            | 11               | 13  | N2189fs                         | c.6566dupA            | 11               | 71  | N2189_C2212delinsKR | c.6567_6634delinsA C | 11   | 17  |
| 49               | Breast      | E83_L88delinsDW               | c.249_263delinsTTG   | 3                | 18  | Q84*                            | c.250C>T              | 3                | 42  |                     |                      |      |     |
| 50               | Breast      | Q649Y                         | c.1945_1947delinsTAC | 11               | 59  | Q649*                           | c.1945C>T             | 11               | 17  | D750N               | c.2248G>A            | 11   | 67  |
| 51               | Breast      | S646_P655delinsT              | c.1937_1963del27     | 11               | 18  | P655fs                          | c.1964delC            | 11               | 35  |                     |                      |      |     |
| 52               | Breast      | V2102_L2136delinsLNYQI        | c.6304_6406delins13  | 11               | 22  | N2135fs                         | c.6405_6409delCTTAA   | 11               | 65  |                     |                      |      |     |
| 53               | Breast      | C1975_S1982delinsSK           | c.5922_5946delins7   | 11               | 53  | S1982fs                         | c.5946delT            | 11               | 23  |                     |                      |      |     |
| 54               | Breast      | S646_P655delinsT              | c.1937_1963del27     | 11               | 18  | P655fs                          | c.1964delC            | 11               | 46  |                     |                      |      |     |

|    |                                |                        |                         |    |    |                           |                     |    |    |        |                      |    |    |
|----|--------------------------------|------------------------|-------------------------|----|----|---------------------------|---------------------|----|----|--------|----------------------|----|----|
| 55 | Cancer of Unknown Primary      | Q699Y                  | c.2095_2097delinsTAT    | 11 | 5  | Q699*                     | c.2095C>T           | 11 | 62 |        |                      |    |    |
| 56 | Cholangiocarcinoma             | E97*                   | c.289G>T                | 3  | 14 | W1692fs                   | c.5073dupA          | 11 | 15 | C1820R | c.5458_5460delinsAGA | 11 | 9  |
| 57 | Malignant Pleural Mesothelioma | N2208_T2214delinsSFVLP | c.6623_6640delins12     | 11 | 25 | Y2215fs                   | c.6641dupC          | 11 | 60 |        |                      |    |    |
| 58 | Neuroendocrine tumors          | K1850_F1866del         | c.5547_5598delinsA      | 11 | 79 | I1859fs                   | c.5576_5579delTTAA  | 11 | 9  |        |                      |    |    |
| 59 | Ovarian                        | N1973_S1989del         | c.5917_5967del51        | 11 | 11 | S1982fs                   | c.5946delT          | 11 | 51 |        |                      |    |    |
| 60 | Ovarian                        | C1853_I1859delinsLN    | c.5558_5577delinsTAAAC  | 11 | 57 | I1859fs                   | c.5576_5579delTTAA  | 11 | 21 |        |                      |    |    |
| 61 | Ovarian                        | E471K                  | c.1411G>A               | 10 | 43 | E471*                     | c.1411G>T           | 10 | 51 |        |                      |    |    |
| 62 | Ovarian                        | E1311_Y1313delinsST    | c.3931_3939delinsTCAACA | 11 | 7  | E1311*                    | c.3931G>T           | 11 | 30 | K3059N | c.9177A>C            | 24 | 31 |
| 63 | Ovarian                        | V1283_S1284del         | c.3848_3853delTAAGTG    | 11 | 31 | S1284fs                   | c.3849_3852delAAGT  | 11 | 39 |        |                      |    |    |
| 64 | Ovarian                        | S1979_V1999delinsM     | c.5936_5995del60        | 11 | 35 | S1982fs                   | c.5946delT          | 11 | 33 |        |                      |    |    |
| 65 | Ovarian                        | H1918Y                 | c.5752C>T               | 11 | 76 |                           |                     |    |    |        |                      |    |    |
| 66 | Ovarian                        | R3128W                 | c.9382_9384delinsTGG    | 25 | 77 | R3128*                    | c.9382C>T           | 25 | 11 |        |                      |    |    |
| 67 | Prostate                       | Y1894K                 | c.5680_5682delinsAAG    | 11 | 52 | Y1894*                    | c.5682C>G           | 11 | 21 |        |                      |    |    |
| 68 | Prostate                       | S1982fs                | c.5946delT              | 11 | 57 | S1982_V1999delinsRENSRYQM | c.5946_5995delins23 | 11 | 27 |        |                      |    |    |
| 69 | Prostate                       | R2520S                 | c.7558_7559delinsTC     | 15 | 15 | R2520*                    | c.7558C>T           | 15 | 40 |        |                      |    |    |
| 70 | Prostate                       | A1972_S1985del         | c.5915_5956del42        | 11 | 11 | S1982fs                   | c.5946delT          | 11 | 70 |        |                      |    |    |
| 71 | Prostate                       | D1484_P1496del         | c.4451_4489del39        | 11 | 80 | H1488fs                   | c.4464_4465delCA    | 11 | 9  |        |                      |    |    |
| 72 | Endometrial                    | Q66Y                   | c.196_198delinsTAT      | 3  | 14 | Q66*                      | c.196C>T            | 3  | 53 |        |                      |    |    |
| 73 | Endometrial                    | N863fs                 | c.2589delinsAA          | 11 | 26 | N863K                     | c.2589T>A           | 11 | 20 | I1607V | c.4819A>G            | 11 | 52 |
| 74 | Endometrial                    | F12fs                  | c.36delT                | 2  | 53 | F12_K21delinsLKFRLH       | c.36_63delins16     | 2  | 23 |        |                      |    |    |
| 75 | Endometrial                    | D1280_S1284del         | c.3840_3854del15        | 11 | 60 | V1283fs                   | c.3847_3848delGT    | 11 | 20 |        |                      |    |    |

**Table S2. Gene lists on the 592-gene panel and WES panel with high coverage.**

| 592 gene panel | WES panel high coverage genes |
|----------------|-------------------------------|
| ABI1           | ABCB11                        |
| ABL1           | ABL1                          |
| ABL2           | ABL2                          |
| ACKR3          | ABRAXAS1                      |
| ACSL3          | ACD                           |
| ACSL6          | ACKR3                         |
| ADGRA2         | ACSL3                         |
| AFDN           | ACSL6                         |
| AFF1           | ACVR1                         |
| AFF3           | ACVR1B                        |
| AFF4           | ADGRA2                        |
| AKAP9          | AFDN                          |
| AKT1           | AFF1                          |

|          |          |
|----------|----------|
| AKT2     | AFF3     |
| AKT3     | AIP      |
| ALDH2    | AJUBA    |
| ALK      | AKT1     |
| AMER1    | AKT2     |
| APC      | AKT3     |
| AR       | ALK      |
| ARAF     | ALOX12B  |
| ARFRP1   | AMER1    |
| ARHGAP26 | ANKRD26  |
| ARHGEF12 | APC      |
| ARID1A   | APLNR    |
| ARID2    | AR       |
| ARNT     | ARAF     |
| ASPSCR1  | ARFRP1   |
| ASXL1    | ARHGAP35 |
| ATF1     | ARHGEF12 |
| ATIC     | ARID1A   |
| ATM      | ARID1B   |
| ATP1A1   | ARID2    |
| ATP2B3   | ARID5B   |
| ATR      | ARNT     |
| ATRX     | ASPSCR1  |
| AURKA    | ASXL1    |
| AURKB    | ASXL2    |
| AXIN1    | ATF1     |
| AXL      | ATIC     |
| BAP1     | ATM      |
| BARD1    | ATP1A1   |
| BCL10    | ATR      |
| BCL11A   | ATRX     |
| BCL11B   | AURKA    |
| BCL2     | AURKB    |
| BCL2L11  | AXIN1    |
| BCL2L2   | AXIN2    |
| BCL3     | AXL      |
| BCL6     | B2M      |
| BCL7A    | BAP1     |
| BCL9     | BARD1    |
| BCOR     | BCL10    |
| BCORL1   | BCL11A   |
| BCR      | BCL11B   |
| BIRC3    | BCL2     |
| BLM      | BCL2L1   |
| BMPR1A   | BCL2L11  |
| BRAF     | BCL2L12  |
| BRCA1    | BCL2L2   |
| BRCA2    | BCL3     |
| BRD3     | BCL6     |
| BRD4     | BCL9     |

|          |          |
|----------|----------|
| BRIP1    | BCOR     |
| BTG1     | BCORL1   |
| BTK      | BIRC3    |
| BUB1B    | BLM      |
| C15orf65 | BMPR1A   |
| CACNA1D  | BRAF     |
| CALR     | BRCA1    |
| CAMTA1   | BRCA2    |
| CANT1    | BRD3     |
| CARD11   | BRD4     |
| CARS     | BRIP1    |
| CASP8    | BTG1     |
| CBFA2T3  | BTG2     |
| CBFB     | BTK      |
| CBL      | BUB1B    |
| CBLB     | C15orf65 |
| CBLC     | CACNA1D  |
| CCDC6    | CALR     |
| CCNB1IP1 | CAMTA1   |
| CCND1    | CARD11   |
| CCND2    | CARS     |
| CCND3    | CASP8    |
| CCNE1    | CBFA2T3  |
| CD274    | CBFB     |
| CD74     | CBL      |
| CD79A    | CBLB     |
| CD79B    | CCDC6    |
| CDC73    | CCND1    |
| CDH1     | CCND2    |
| CDH11    | CCND3    |
| CDK12    | CCNE1    |
| CDK4     | CD22     |
| CDK6     | CD274    |
| CDK8     | CD70     |
| CDKN1B   | CD74     |
| CDKN2A   | CD79A    |
| CDKN2B   | CD79B    |
| CDKN2C   | CDC73    |
| CDX2     | CDH1     |
| CEBPA    | CDH11    |
| CHCHD7   | CDH23    |
| CHEK1    | CDK12    |
| CHEK2    | CDK4     |
| CHIC2    | CDK6     |
| CHN1     | CDK8     |
| CIC      | CDKN1A   |
| CIITA    | CDKN1B   |
| CLP1     | CDKN1C   |
| CLTC     | CDKN2A   |
| CLTCL1   | CDKN2B   |

|         |         |
|---------|---------|
| CNBP    | CDKN2C  |
| CNOT3   | CDX2    |
| CNTRL   | CEBPA   |
| COL1A1  | CHD2    |
| COPB1   | CHD4    |
| COX6C   | CHEK1   |
| CREB1   | CHEK2   |
| CREB3L1 | CHIC2   |
| CREB3L2 | CHN1    |
| CREBBP  | CIC     |
| CRKL    | CIITA   |
| CRLF2   | CLTCL1  |
| CRTC1   | CLYBL   |
| CRTC3   | CNBP    |
| CSF1R   | CNOT3   |
| CSF3R   | COX6C   |
| CTCF    | CREB1   |
| CTLA4   | CREB3L1 |
| CTNNA1  | CREB3L2 |
| CTNNB1  | CREBBP  |
| CYLD    | CRKL    |
| CYP2D6  | CRLF2   |
| DAXX    | CRTC1   |
| DDB2    | CRTC3   |
| DDIT3   | CSF1R   |
| DDR2    | CSF3R   |
| DDX10   | CTCF    |
| DDX5    | CTLA4   |
| DDX6    | CTNNA1  |
| DEK     | CTNNB1  |
| DICER1  | CUL3    |
| DNM2    | CUL4A   |
| DNMT3A  | CUX1    |
| DOT1L   | CXCR4   |
| EBF1    | CYLD    |
| ECT2L   | CYP17A1 |
| EGFR    | CYP2D6  |
| EIF4A2  | DAXX    |
| ELF4    | DDB2    |
| ELK4    | DDIT3   |
| ELL     | DDR1    |
| ELN     | DDR2    |
| EML4    | DDX3X   |
| EMSY    | DDX41   |
| EP300   | DDX6    |
| EPHA3   | DEK     |
| EPHA5   | DICER1  |
| EPHB1   | DIS3    |
| EPS15   | DIS3L2  |
| ERBB2   | DKC1    |

|         |        |
|---------|--------|
| ERBB3   | DMC1   |
| ERBB4   | DNA2   |
| ERC1    | DNAJB1 |
| ERCC1   | DNMT3A |
| ERCC2   | DOT1L  |
| ERCC3   | EBF1   |
| ERCC4   | ECT2L  |
| ERCC5   | EED    |
| ERG     | EGFR   |
| ESR1    | EGLN1  |
| ETV1    | EIF1AX |
| ETV4    | EIF4A2 |
| ETV5    | ELF3   |
| ETV6    | ELK4   |
| EWSR1   | ELOC   |
| EXT1    | EME1   |
| EXT2    | EME2   |
| EZH2    | EML4   |
| EZR     | EMSY   |
| FAM46C  | EP300  |
| FANCA   | EPCAM  |
| FANCC   | EPHA2  |
| FANCD2  | EPHA3  |
| FANCE   | EPHA5  |
| FANCF   | EPHA7  |
| FANCG   | EPHB1  |
| FANCL   | EPHB4  |
| FAS     | ERBB2  |
| FBXO11  | ERBB3  |
| FBXW7   | ERBB4  |
| FCRL4   | ERC1   |
| FEV     | ERCC1  |
| FGF10   | ERCC2  |
| FGF14   | ERCC3  |
| FGF19   | ERCC4  |
| FGF23   | ERCC5  |
| FGF3    | ERCC6  |
| FGF4    | EREG   |
| FGF6    | ERG    |
| FGFR1   | ERRFI1 |
| FGFR1OP | ESR1   |
| FGFR2   | ETS1   |
| FGFR3   | ETV1   |
| FGFR4   | ETV4   |
| FH      | ETV5   |
| FHIT    | ETV6   |
| FIP1L1  | EWSR1  |
| FLCN    | EXO1   |
| FLI1    | EXT1   |
| FLT1    | EXT2   |

|           |         |
|-----------|---------|
| FLT3      | EZH2    |
| FLT4      | EZR     |
| FNBP1     | FAM46C  |
| FOXA1     | FANCA   |
| FOXL2     | FANCB   |
| FOXO1     | FANCC   |
| FOXO3     | FANCD2  |
| FOXO4     | FANCE   |
| FOXP1     | FANCF   |
| FSTL3     | FANCG   |
| FUBP1     | FANCI   |
| FUS       | FANCL   |
| GAS7      | FANCM   |
| GATA1     | FAS     |
| GATA2     | FAT1    |
| GATA3     | FAT3    |
| GID4      | FBXO11  |
| GMPS      | FBXW7   |
| GNA11     | FCRL4   |
| GNA13     | FEN1    |
| GNAQ      | FGF10   |
| GNAS      | FGF12   |
| GOLGA5    | FGF14   |
| GOPC      | FGF19   |
| GPC3      | FGF23   |
| GPHN      | FGF3    |
| GRIN2A    | FGF4    |
| GSK3B     | FGF6    |
| H3F3A     | FGFR1   |
| H3F3B     | FGFR1OP |
| HERPUD1   | FGFR2   |
| HEY1      | FGFR3   |
| HGF       | FGFR4   |
| HIP1      | FH      |
| HIST1H3B  | FHIT    |
| HIST1H4I  | FIP1L1  |
| HLF       | FLCN    |
| HMGA1     | FLI1    |
| HMGA2     | FLT1    |
| HMGN2P46  | FLT3    |
| HNF1A     | FLT4    |
| HNRNPA2B1 | FNBP1   |
| HOOK3     | FOXA1   |
| HOXA11    | FOXL2   |
| HOXA13    | FOXO1   |
| HOXA9     | FOXO3   |
| HOXC11    | FOXO4   |
| HOXC13    | FOXP1   |
| HOXD11    | FRS2    |
| HOXD13    | FSTL3   |



|          |          |
|----------|----------|
| HRAS     | FUBP1    |
| HSP90AA1 | FUS      |
| HSP90AB1 | FYN      |
| IDH1     | GABRA6   |
| IDH2     | GALNT12  |
| IGF1R    | GATA1    |
| IKBKE    | GATA2    |
| IKZF1    | GATA3    |
| IL2      | GATA4    |
| IL21R    | GATA6    |
| IL6ST    | GEN1     |
| IL7R     | GID4     |
| INHBA    | GLI1     |
| IRF4     | GLI2     |
| IRS2     | GMPS     |
| ITK      | GNA11    |
| JAK1     | GNA13    |
| JAK2     | GNAQ     |
| JAK3     | GNAS     |
| JAZF1    | GOPC     |
| JUN      | GPC3     |
| KAT6A    | GPS2     |
| KAT6B    | GREM1    |
| KCNJ5    | GRIN2A   |
| KDM5A    | GRM3     |
| KDM5C    | GSK3B    |
| KDM6A    | H2AFX    |
| KDR      | H3F3A    |
| KDSR     | H3F3B    |
| KEAP1    | HDAC1    |
| KIAA1549 | HEY1     |
| KIF5B    | HGF      |
| KIT      | HIF1A    |
| KLF4     | HIST1H3B |
| KLHL6    | HIST1H3C |
| KLK2     | HIST1H4I |
| KMT2A    | HLF      |
| KMT2C    | HMGA2    |
| KMT2D    | HMGN2P46 |
| KNL1     | HNF1A    |
| KRAS     | HOOK3    |
| KTN1     | HOXA11   |
| LASP1    | HOXA13   |
| LCK      | HOXA9    |
| LCP1     | HOXB13   |
| LGR5     | HOXD13   |
| LHFPL6   | HRAS     |
| LIFR     | HRG      |
| LMO1     | HRR      |
| LMO2     | HSD3B1   |

|        |          |
|--------|----------|
| LPP    | HSP90AA1 |
| LRIG3  | HSP90AB1 |
| LRP1B  | ID2      |
| LYL1   | ID3      |
| MAF    | IDH1     |
| MAFB   | IDH2     |
| MALT1  | IFNGR1   |
| MAML2  | IGF1R    |
| MAP2K1 | IGF2     |
| MAP2K2 | IKBKE    |
| MAP2K4 | IKZF1    |
| MAP3K1 | IL7R     |
| MAX    | INHBA    |
| MCL1   | INPP4B   |
| MDM2   | IRF1     |
| MDM4   | IRF2     |
| MDS2   | IRF4     |
| MECOM  | IRS2     |
| MED12  | ITK      |
| MEF2B  | JAK1     |
| MEN1   | JAK2     |
| MET    | JAK3     |
| MITF   | JAZF1    |
| MKL1   | JUN      |
| MLF1   | KAT6A    |
| MLH1   | KAT6B    |
| MLLT1  | KCNJ5    |
| MLLT10 | KDM5A    |
| MLLT11 | KDM5C    |
| MLLT3  | KDM6A    |
| MLLT6  | KDR      |
| MN1    | KDSR     |
| MNX1   | KEAP1    |
| MPL    | KEL      |
| MRE11  | KIAA1549 |
| MSH2   | KIF1B    |
| MSH6   | KIF5B    |
| MSI2   | KIT      |
| MSN    | KLF4     |
| MTCP1  | KLHL6    |
| MTOR   | KLK2     |
| MUC1   | KMT2A    |
| MUTYH  | KMT2C    |
| MYB    | KMT2D    |
| MYC    | KRAS     |
| MYCL   | LCK      |
| MYCN   | LDLR     |
| MYD88  | LHFPL6   |
| MYH11  | LIFR     |
| MYH9   | LIG1     |

|          |         |
|----------|---------|
| NACA     | LMNA    |
| NBN      | LMO1    |
| NCKIPSD  | LMO2    |
| NCOA1    | LOH     |
| NCOA2    | LPP     |
| NCOA4    | LRP1B   |
| NDRG1    | LTK     |
| NF1      | LYN     |
| NF2      | LZTR1   |
| NFE2L2   | MAF     |
| NFIB     | MAFB    |
| NFKB2    | MAGI2   |
| NFKBIA   | MALT1   |
| NIN      | MAML2   |
| NKX2-1   | MAP2K1  |
| NONO     | MAP2K2  |
| NOTCH1   | MAP2K4  |
| NOTCH2   | MAP3K1  |
| NPM1     | MAP3K13 |
| NR4A3    | MAPK1   |
| NRAS     | MAPK3   |
| NSD1     | MAX     |
| NSD2     | MBD4    |
| NSD3     | MCL1    |
| NT5C2    | MDC1    |
| NTRK1    | MDM2    |
| NTRK2    | MDM4    |
| NTRK3    | MDS2    |
| NUMA1    | MECOM   |
| NUP214   | MED12   |
| NUP93    | MEF2B   |
| NUP98    | MEN1    |
| NUTM1    | MERTK   |
| NUTM2B   | MET     |
| OLIG2    | MGA     |
| OMD      | MGMT    |
| P2RY8    | MITF    |
| PAFAH1B2 | MKNK1   |
| PAK3     | MLF1    |
| PALB2    | MLH1    |
| PATZ1    | MLH3    |
| PAX3     | MLLT10  |
| PAX5     | MLLT11  |
| PAX7     | MLLT3   |
| PAX8     | MN1     |
| PBRM1    | MPL     |
| PBX1     | MRE11   |
| PCM1     | MSH2    |
| PCSK7    | MSH3    |
| PDCD1    | MSH6    |

|          |        |
|----------|--------|
| PDCD1LG2 | MSI2   |
| PDE4DIP  | MST1R  |
| PDGFB    | MTAP   |
| PDGFRA   | MTCP1  |
| PDGFRB   | MTOR   |
| PDK1     | MUC1   |
| PER1     | MUS81  |
| PHF6     | MUTYH  |
| PHOX2B   | MYB    |
| PICALM   | MYC    |
| PIK3CA   | MYCL   |
| PIK3CG   | MYCN   |
| PIK3R1   | MYD88  |
| PIK3R2   | MYH11  |
| PIM1     | MYH9   |
| PLAG1    | NBN    |
| PML      | NCOA2  |
| PMS1     | NCOA3  |
| PMS2     | NCOA4  |
| POLE     | NCOR1  |
| POT1     | NDRG1  |
| POU2AF1  | NF1    |
| POU5F1   | NF2    |
| PPARG    | NFE2L2 |
| PPP2R1A  | NFIB   |
| PRCC     | NFKB2  |
| PRDM1    | NFKBIA |
| PRDM16   | NFKBIE |
| PRF1     | NIN    |
| PRKAR1A  | NKX2-1 |
| PRKDC    | NONO   |
| PRRX1    | NOTCH1 |
| PSIP1    | NOTCH2 |
| PTCH1    | NOTCH3 |
| PTEN     | NPM1   |
| PTPN11   | NR4A3  |
| PTPRC    | NRAS   |
| RABEP1   | NSD1   |
| RAC1     | NSD2   |
| RAD21    | NSD3   |
| RAD50    | NT5C2  |
| RAD51    | NTHL1  |
| RAD51B   | NTRK1  |
| RAF1     | NTRK2  |
| RALGDS   | NTRK3  |
| RANBP17  | NUP214 |
| RAP1GDS1 | NUP93  |
| RARA     | NUP98  |
| RB1      | NUTM1  |
| RBM15    | OLIG2  |

|         |          |
|---------|----------|
| RECQL4  | P2RY8    |
| REL     | PAFAH1B2 |
| RET     | PAK1     |
| RHOH    | PAK3     |
| RICTOR  | PALB2    |
| RMI2    | PARP1    |
| RNF213  | PARP2    |
| RNF43   | PARP3    |
| ROS1    | PAX3     |
| RPL10   | PAX5     |
| RPL22   | PAX7     |
| RPL5    | PAX8     |
| RPN1    | PBRM1    |
| RPTOR   | PBX1     |
| RUNX1   | PCM1     |
| RUNx1T1 | PDCD1    |
| SBDS    | PDCD1LG2 |
| SDC4    | PDE4DIP  |
| SDHAF2  | PDGFB    |
| SDHB    | PDGFRA   |
| SDHC    | PDGFRB   |
| SDHD    | PDK1     |
| SEPT5   | PER1     |
| SEPT6   | PHF6     |
| SEPT9   | PHOX2B   |
| SET     | PIK3C2B  |
| SETBP1  | PIK3C2G  |
| SETD2   | PIK3CA   |
| SF3B1   | PIK3CB   |
| SFPQ    | PIK3CD   |
| SH2B3   | PIK3CG   |
| SH3GL1  | PIK3R1   |
| SLC34A2 | PIK3R2   |
| SLC45A3 | PIM1     |
| SMAD2   | PLAG1    |
| SMAD4   | PLCG2    |
| SMARCA4 | PML      |
| SMARCB1 | PMS1     |
| SMARCE1 | PMS2     |
| SMO     | POLD1    |
| SNX29   | POLD2    |
| SOCS1   | POLD3    |
| SOX10   | POLD4    |
| SOX2    | POLE     |
| SPECC1  | POLH     |
| SPEN    | POLQ     |
| SPOP    | POT1     |
| SRC     | POU2AF1  |
| SRGAP3  | PPARG    |
| SRSF2   | PPM1D    |

|          |         |
|----------|---------|
| SRSF3    | PPP2R1A |
| SS18     | PPP2R2A |
| SS18L1   | PPP6C   |
| SSX1     | PRCC    |
| STAG2    | PRDM1   |
| STAT3    | PREX2   |
| STAT4    | PRF1    |
| STAT5B   | PRKACA  |
| STIL     | PRKAR1A |
| STK11    | PRKCH   |
| SUFU     | PRKCI   |
| SUZ12    | PRKDC   |
| SYK      | PRKN    |
| TAF15    | PRRX1   |
| TAL1     | PRSS8   |
| TAL2     | PTCH1   |
| TBL1XR1  | PTCH2   |
| TCEA1    | PTEN    |
| TCF12    | PTK2B   |
| TCF3     | PTPN11  |
| TCF7L2   | PTPN22  |
| TCL1A    | PTPRC   |
| TERT     | PTPRD   |
| TET1     | PTPRO   |
| TET2     | PTPRT   |
| TFE3     | QKI     |
| TFEB     | RABL3   |
| TFG      | RAC1    |
| TFPT     | RAD21   |
| TFRC     | RAD50   |
| TGFBR2   | RAD51   |
| THRAP3   | RAD51B  |
| TLX1     | RAD51C  |
| TLX3     | RAD51D  |
| TMPRSS2  | RAD52   |
| TNFAIP3  | RAD54B  |
| TNFRSF14 | RAD54L  |
| TNFRSF17 | RAF1    |
| TOP1     | RANBP2  |
| TP53     | RARA    |
| TPM3     | RASA1   |
| TPM4     | RB1     |
| TPR      | RBBP8   |
| TRAF7    | RBM10   |
| TRIM26   | RCAN1   |
| TRIM27   | RECQL4  |
| TRIM33   | REL     |
| TRIP11   | REL     |
| TRRAP    | RELA    |
| TSC1     | RET     |

|        |          |
|--------|----------|
| TSC2   | RHEB     |
| TSHR   | RHOA     |
| TTL    | RHOH     |
| U2AF1  | RICTOR   |
| UBR5   | RINT1    |
| USP6   | RIT1     |
| VEGFA  | RMI2     |
| VEGFB  | RNF43    |
| VHL    | ROS1     |
| VTI1A  | RPA1     |
| WAS    | RPA2     |
| WDCP   | RPA3     |
| WIF1   | RPA4     |
| WISP3  | RPL10    |
| WRN    | RPL22    |
| WT1    | RPL5     |
| WWTR1  | RPN1     |
| XPA    | RPTOR    |
| XPC    | RRAS2    |
| XPO1   | RSPO1    |
| YWHAE  | RSPO2    |
| ZBTB16 | RSPO3    |
| ZMYM2  | RUNX1    |
| ZNF217 | RUNx1T1  |
| ZNF331 | SBDS     |
| ZNF384 | SDC4     |
| ZNF521 | SDHA     |
| ZNF703 | SDHAF2   |
| ZRSR2  | SDHB     |
|        | SDHC     |
|        | SDHD     |
|        | SEM1     |
|        | SERPINB3 |
|        | SET      |
|        | SETBP1   |
|        | SETD2    |
|        | SF3B1    |
|        | SFPQ     |
|        | SGK1     |
|        | SH2B3    |
|        | SLC34A2  |
|        | SLIT2    |
|        | SLX4     |
|        | SMAD2    |
|        | SMAD3    |
|        | SMAD4    |
|        | SMARCA1  |
|        | SMARCA4  |
|        | SMARCB1  |
|        | SMARCE1  |

|         |
|---------|
| SMC3    |
| SMO     |
| SNCAIP  |
| SNX29   |
| SOCS1   |
| SOS1    |
| SOX10   |
| SOX2    |
| SOX9    |
| SPECC1  |
| SPEN    |
| SPOP    |
| SPRED1  |
| SPTA1   |
| SRC     |
| SRGAP3  |
| SRSF2   |
| SRSF3   |
| SS18    |
| SSBP1   |
| STAG2   |
| STAT3   |
| STAT4   |
| STAT5B  |
| STAT6   |
| STIL    |
| STK11   |
| SUFU    |
| SUZ12   |
| SYK     |
| TAF1    |
| TAF15   |
| TAL1    |
| TAL2    |
| TBX3    |
| TBXT    |
| TCEA1   |
| TCF3    |
| TCF7L2  |
| TEK     |
| TERC    |
| TERF2IP |
| TERT    |
| TET1    |
| TET2    |
| TFE3    |
| TFEB    |
| TFG     |
| TFRC    |
| TGFBR1  |



|          |
|----------|
| TGFBR2   |
| THRAP3   |
| TIPARP   |
| TLX3     |
| TMEM127  |
| TNF      |
| TNFAIP3  |
| TNFRSF14 |
| TOP1     |
| TOP2A    |
| TOP3A    |
| TOP3B    |
| TP53     |
| TPM3     |
| TPM4     |
| TRAF3    |
| TRAF7    |
| TRIM27   |
| TRRAP    |
| TSC1     |
| TSC2     |
| TSHR     |
| TSHZ3    |
| TYK2     |
| TYRO3    |
| U2AF1    |
| UBE2T    |
| UBR5     |
| USP6     |
| VEGFA    |
| VHL      |
| VTI1A    |
| WAS      |
| WDCP     |
| WISP3    |
| WRN      |
| WT1      |
| WWTR1    |
| XPA      |
| XPC      |
| XPO1     |
| XRCC1    |
| XRCC2    |
| XRCC3    |
| YAP1     |
| YES1     |
| YWHAE    |
| ZBTB16   |
| ZBTB2    |
| ZFHX3    |

|        |
|--------|
| ZNF217 |
| ZNF331 |
| ZNF384 |
| ZNF521 |
| ZNF703 |
| ZNRF3  |
| ZRSR2  |
